# Supplementary material
Source: publisher figshare collection journal article supplement (https://acs.figshare.com/ndownloader/files/10527937)
Supplement: Supplementary file 1 [file 10527937]

**Supporting Information for**

**Manipulating the Filler Network Structure and Properties of  
Polylactide/Carbon Black Nanocomposites with the Aid of  
Stereocomplex Crystallites**

Huili Liu, Dongyu Bai, Hongwei Bai\*, Qin Zhang, Qiang Fu\*

College of Polymer Science and Engineering, State Key Laboratory of Polymer

Materials Engineering, Sichuan University, Chengdu 610065, P. R. China

**\*Corresponding author**

Tel./Fax: +86 28 8546 1795. E-mail: hongweibai@scu.edu.cn, bhw\_168@163.com

(H.W. Bai); qiangfu@scu.edu.cn (Q. Fu).

To characterize the thermal degradation behaviors of PLLA/PDLA/CB nanocomposites during annealing treatment at 240 °C, thermogravimetric analysis (TGA) was conducted using a TA Q500 instrument (USA) under a dry nitrogen atmosphere. The specimens were heated to 240 °C at a heating rate of 50 °C/min and then held at this temperature for 30 min.

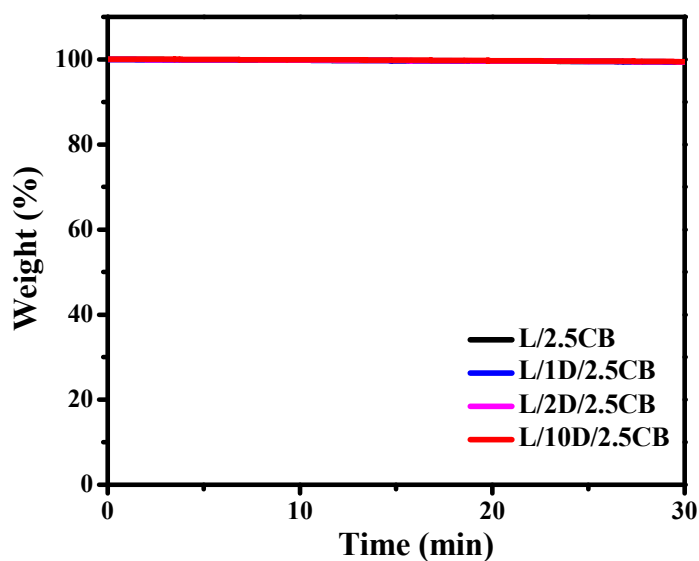

**Figure S1.** TGA curves of the PLLA/PDLA/CB nanocomposites.

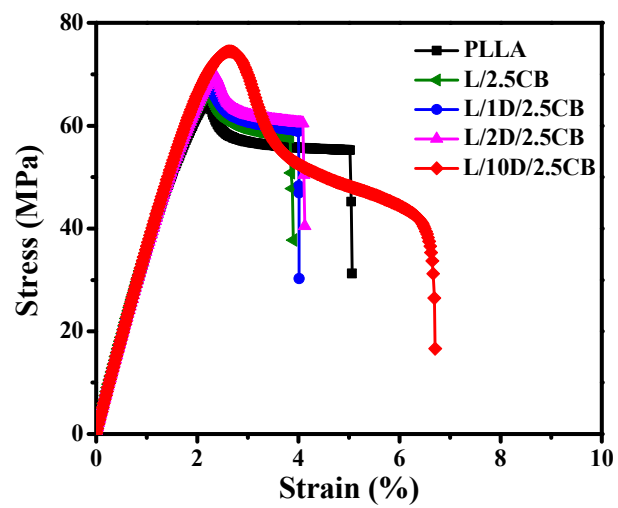

**Figure S2.** Stress-strain curves of the PLLA/PDLA/CB nanocomposites.
